# Supplementary material
Source: PubMed Central journal article supplement (PMC2889109)
Supplement: 1000304107_pnas.201000304SI.pdf [file 1000304107_pnas.201000304SI.pdf]

# Supporting Information

Gudleski et al. 10.1073/pnas.1000304107

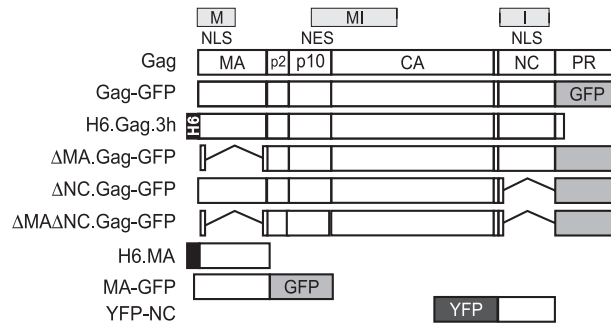

**Fig. S1.** Schematic of Gag expression constructs. The WT RSV Gag polyprotein contains MA, p2, p10, CA, NC, and PR domains. The nuclear localization domains (NLS), membrane-binding domain (M, residues 1–86), NES (residues 219–229), multimerization interface (MI), and Gag-vRNA interaction (I) domain are denoted. In Gag-GFP derivatives, GFP replaces seven amino acids of NC and the entire PR domain. H6.Gag.3h and H6.MA each contain an N-terminal 6-histidine tag (H6). H6.Gag.3h includes the WT Gag sequence through the first seven amino acids of PR. The ΔMA construct has residues 5–148 deleted. In ΔNC, all but the N-terminal seven amino acids were deleted. MA-GFP and YFP-NC fusion proteins are depicted.





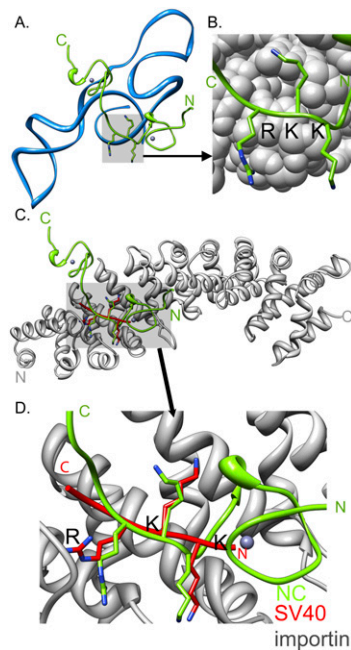

**Fig. 54.** Comparison of vRNA and imp- $\alpha$  binding sites in NC. (A) Ribbon diagram of the RSV NC protein in a binary complex with the  $\mu\psi$ -RNA packaging signal (PDB ID code 2IHX, model 13) (1). The RNA is shown in blue, and the NC protein is shown in green. The zinc ions are shown as gray spheres. (B) Close-up of the basic residues RKK in NC and their contacts with the  $\mu\psi$ -RNA, which are depicted as gray spheres in the space-filling model. (C) Ribbon diagram of imp- $\alpha$  (gray ribbon) in a complex with the NLS peptide of the SV40 T antigen (red; PDB ID code 1BK6) (2). The NC protein, in the same orientation as in A, has been superimposed onto the equivalent residues of the NLS peptide of SV40 T antigen. In this orientation, the imp- $\alpha$  binding site and the RNA binding site in NC colocalize, suggesting that these binding events are mutually exclusive. (D) Close-up of the NLS binding site in imp- $\alpha$ . Side chain residues are shown in stick representation with nitrogen atoms colored blue. The side chain atoms of the basic residues in the SV40 T-antigen NLS and homologous basic residues in NC superimpose well, suggesting that the binding site of RSV NC is preformed in the RNA-bound conformation.

- Zhou J, McAllen JK, Tailor Y, Summers MF (2005) High affinity nucleocapsid protein binding to the  $\mu\psi$  RNA packaging signal of Rous sarcoma virus. *J Mol Biol* 349:976–988.
- Conti E, Uy M, Leighton L, Blobel G, Kuriyan J (1998) Crystallographic analysis of the recognition of a nuclear localization signal by the nuclear import factor karyopherin alpha. *Cell* 94: 193–204.

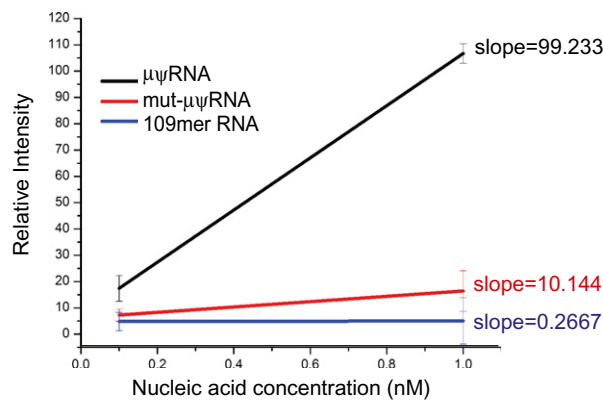

slope of  $\mu\psi$ RNA increased 372-fold over 109mer RNA  
 slope of  $\mu\psi$ RNA increased 9.78-fold over mut- $\mu\psi$ RNA

**Fig. 55.** Analysis of Gag:CRM1:RanGTP complexes stabilized by RNA. Quantitative analysis of data shown in Fig. 4B. The average intensities ( $\pm$ SEM) of H6. Gag.3h signals detected by Western blotting from three independent experiments were quantified using ImageJ software (1) and plotted against nucleic acid/protein molar ratios. Analysis of the slope of the curves indicated that  $\mu\psi$ -RNA stimulated Gag:CRM1 binding 9.78-fold over mut- $\mu\psi$ -RNA ( $P = 0.001$ ) and 372-fold compared with nonviral 109-nt RNA ( $P = 0.0002$ ).

- Abramoff MD, Magelhaes PJ, Ram SJ (2004) Image processing with ImageJ. *Biophotonics Int* 11:36–42.
